# Supplementary material for: An integrative framework to prioritize genes in more than 500 loci associated with body mass index
Source: PubMed Central journal article supplement (PMC11179420; doi:10.1016/j.ajhg.2024.04.016), 2024-05-15
Supplement: mmc1.pdf [file mmc1.pdf]

**The American Journal of Human Genetics, Volume 111**

**Supplemental information**

**An integrative framework to prioritize genes  
in more than 500 loci associated  
with body mass index**

**Daiane Hemerich, Victor Svenstrup, Virginia Diez Obrero, Michael Preuss, Arden  
Moscati, Joel N. Hirschhorn, and Ruth J.F. Loos**

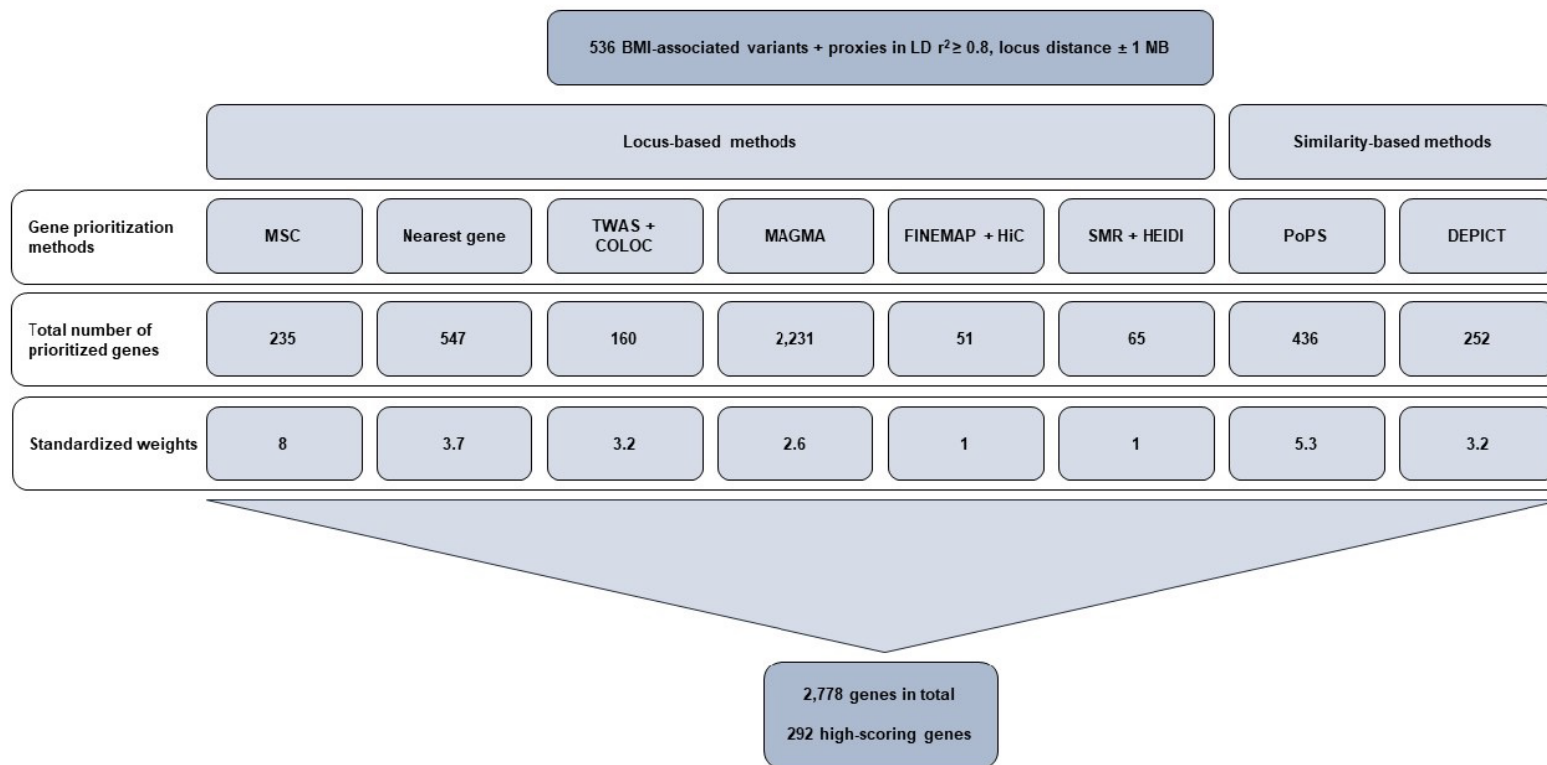

**Figure S1. Flowchart of pipeline, number of genes prioritized and contribution (weights) of each method to the overall scoring of prioritized genes.**
